# Supplementary material for: Elucidating the genomic history of commercially used Bacillus thuringiensis subsp. tenebrionis strain NB176
Source: Front Cell Infect Microbiol. 2023 Mar 20;13:1129177. doi: 10.3389/fcimb.2023.1129177 (PMC10067926; doi:10.3389/fcimb.2023.1129177)
Supplement: Supplementary file 12 [file Table_10.xlsx]

## Sheet: Tabelle1
Supplementary Table 10: Reciprocal ANIb (ANI algorithm using BLAST) values [%] and aligned percentage (in parentheses) between the three genomes under assessment (NB125, NB176-1, and NB176) and the selected type-strain-genomes.
#ANIb and aligned percentage
	Bacillus albus N35-10-2	Bacillus anthracis ATCC 14578	Bacillus cereus ATCC 14579	Bacillus fungorum 17-SMS-01	Bacillus luti MCCC 1A00359	Bacillus mobilis MCCC 1A05942	Bacillus paranthracis MCCC 1A00395	Bacillus proteolyticus MCCC 1A00365	Bacillus thuringiensis ATCC 10792	Bacillus toyonensis NCIMB 14858	Bacillus tropicus N24	Bacillus wiedmannii FSL W8-0169	NB125 (DSM 5526)	NB176-1 (DSM 5480)	NB176
Bacillus albus N35-10-2	*	92.67 [76.24]	90.59 [74.10]	92.17 [70.19]	90.39 [70.54]	92.97 [73.76]	92.62 [74.15]	88.87 [70.38]	90.44 [75.96]	89.91 [69.35]	92.56 [74.02]	92.93 [76.63]	90.75 [75.96]	90.75 [75.94]	90.67 [74.13]
Bacillus anthracis ATCC 14578	92.99 [80.36]	*	91.04 [76.87]	92.76 [74.01]	90.92 [73.18]	92.27 [77.80]	94.76 [80.13]	89.26 [73.54]	90.87 [78.36]	90.38 [71.38]	94.30 [79.32]	92.62 [77.08]	90.83 [77.81]	90.84 [77.79]	90.75 [76.13]
Bacillus cereus ATCC 14579	91.01 [79.28]	91.18 [78.26]	*	90.86 [72.46]	90.77 [74.58]	90.66 [75.64]	91.25 [77.84]	89.49 [73.71]	96.51 [85.96]	91.04 [75.46]	91.52 [78.25]	90.95 [77.98]	95.63 [85.40]	95.63 [85.39]	95.48 [83.52]
Bacillus fungorum 17-SMS-01	92.40 [71.43]	92.80 [71.69]	90.89 [68.43]	*	90.93 [65.84]	92.61 [72.12]	92.91 [69.93]	89.28 [66.71]	90.59 [71.56]	90.42 [65.18]	93.25 [70.72]	92.95 [69.98]	90.80 [71.09]	90.82 [71.04]	90.77 [69.67]
Bacillus luti MCCC 1A00359	90.90 [78.79]	91.05 [77.85]	90.74 [77.86]	91.00 [73.57]	*	91.00 [79.57]	91.17 [78.12]	89.94 [77.50]	90.82 [77.82]	90.68 [75.97]	91.33 [78.63]	91.24 [79.71]	90.71 [77.98]	90.71 [77.98]	90.65 [76.24]
Bacillus mobilis MCCC 1A05942	93.05 [75.79]	92.16 [76.09]	90.37 [72.44]	92.48 [72.04]	90.65 [72.93]	*	92.35 [75.11]	89.33 [70.67]	90.33 [75.53]	90.08 [69.47]	92.49 [75.95]	93.87 [76.35]	90.40 [74.91]	90.41 [74.90]	90.35 [73.46]
Bacillus paranthracis MCCC 1A00395	92.82 [77.93]	94.71 [79.62]	91.17 [75.90]	92.77 [72.57]	90.97 [73.46]	92.46 [76.55]	*	89.20 [72.32]	90.94 [76.53]	90.34 [70.39]	94.77 [78.36]	92.58 [76.32]	90.82 [75.46]	90.82 [75.46]	90.75 [73.77]
Bacillus proteolyticus MCCC 1A00365	88.77 [70.66]	88.83 [69.64]	88.82 [69.25]	88.74 [66.24]	89.24 [69.86]	88.92 [69.15]	88.79 [69.16]	*	88.98 [70.85]	89.68 [67.80]	89.01 [70.38]	89.35 [70.50]	88.81 [69.71]	88.81 [69.71]	88.72 [68.25]
Bacillus thuringiensis ATCC 10792	90.43 [70.01]	90.38 [68.81]	95.96 [74.22]	90.20 [64.94]	90.33 [64.14]	90.18 [68.12]	90.61 [67.62]	89.08 [65.14]	*	90.67 [65.33]	90.98 [68.60]	90.60 [67.75]	95.35 [77.42]	95.32 [76.68]	95.17 [75.14]
Bacillus toyonensis NCIMB 14858	90.64 [78.68]	90.62 [77.58]	91.30 [80.14]	90.69 [73.88]	90.88 [77.28]	90.51 [77.27]	90.70 [76.65]	90.49 [76.90]	91.40 [80.81]	*	90.82 [77.80]	91.07 [80.17]	91.36 [80.62]	91.36 [80.59]	91.23 [78.86]
Bacillus tropicus N24	92.94 [81.03]	94.39 [82.66]	91.38 [80.13]	93.25 [76.58]	91.17 [77.20]	92.64 [80.99]	94.88 [82.50]	89.59 [76.66]	91.31 [81.63]	90.60 [74.91]	*	92.94 [81.10]	91.10 [78.83]	91.10 [78.82]	91.01 [77.10]
Bacillus wiedmannii FSL W8-0169	93.33 [82.28]	92.62 [78.78]	90.89 [78.09]	92.98 [74.11]	90.94 [76.74]	94.03 [80.24]	92.71 [78.17]	89.87 [75.04]	91.01 [78.87]	90.76 [75.24]	92.94 [79.41]	*	91.05 [78.53]	91.05 [78.52]	90.96 [76.75]
NB125 (DSM 5526)	90.59 [71.42]	90.45 [69.83]	95.02 [74.73]	90.44 [66.08]	90.30 [64.71]	90.41 [68.15]	90.55 [67.43]	89.06 [64.99]	95.38 [79.41]	90.81 [65.54]	90.84 [67.04]	90.81 [67.69]	*	99.97 [98.08]	99.77 [95.78]
NB176-1 (DSM 5480)	90.58 [71.92]	90.42 [70.21]	94.98 [75.07]	90.43 [66.48]	90.25 [65.01]	90.43 [68.23]	90.50 [67.70]	89.01 [65.39]	95.30 [79.06]	90.82 [65.70]	90.80 [67.42]	90.77 [68.05]	100.00 [98.96]	*	99.79 [96.66]
NB176	90.64 [71.84]	90.46 [70.31]	94.97 [75.46]	90.40 [66.79]	90.28 [65.08]	90.46 [68.79]	90.43 [67.80]	89.01 [65.48]	95.30 [79.67]	90.84 [65.87]	90.84 [67.49]	90.75 [68.39]	100.00 [98.90]	100.00 [98.92]	*
