# Supplementary material for: Elucidating the genomic history of commercially used Bacillus thuringiensis subsp. tenebrionis strain NB176
Source: Front Cell Infect Microbiol. 2023 Mar 20;13:1129177. doi: 10.3389/fcimb.2023.1129177 (PMC10067926; doi:10.3389/fcimb.2023.1129177)
Supplement: Supplementary file 13 [file Table_11.xlsx]

## Sheet: Tabelle1
Supplementary Table 11: Closest type strain genomes of NB125, NB176-1, and NB176 based on digital DNA-DNA-Hybridization. The complete genome sequences of NB125, NB176-1 and NB176 were uploaded to the Type (Strain) Genome Server (TYGS) and closest type strains genomes were determined automatically.
Name	Assembly accession no.
Bacillus thuringiensis ATCC 10792	GCA_000161615.1
Bacillus cereus ATCC 14579	GCA_000007825.1
Bacillus toyonensis NCIMB 14858	GCA_000496285.1.
Bacillus tropicus N24	GCA_001884035.1
Bacillus wiedmannii FSL W8-0169	GCF_001583695.1.
Bacillus paranthracis MCCC 1A00395	GCF_001883995.1.
Bacillus albus N35-10-2	GCA_001884185.1
Bacillus anthracis ATCC 14578	GCF_022221345.1.
Bacillus fungorum 17-SMS-01	GCA_002746455.1.
Bacillus luti MCCC 1A00359	GCF_001884105.1.
Bacillus mobilis MCCC 1A05942	GCF_001884045.1
Bacillus proteolyticus MCCC 1A00365	GCF_001884065.1.
